# Supplementary material for: Association of ISVsa3 with Multidrug Resistance in Salmonella enterica Isolates from Cattle (Bos taurus)
Source: MDPI journal article supplement (doi:10.3390/microorganisms11030631), 2023-03-01
Supplement: s1 [file s1]

**Table S1. Serotypes of *Salmonella* isolates from cattle in accessions submitted to the Nebraska Veterinary Diagnostic Center from 2011-2020.**

| <b>Serotype</b>       | <b>Number of Isolates (%)</b> |
|-----------------------|-------------------------------|
| Typhimurium/3 var. 5- | 18 (19.6%)                    |
| Newport               | 13 (14.1%)                    |
| Dublin                | 10 (10.9%)                    |
| Montevideo            | 8 (8.7%)                      |
| Muenster              | 7 (7.6%)                      |
| Anatum                | 4 (4.3%)                      |
| Muenchen              | 4 (4.3%)                      |
| Oranienburg           | 3 (3.3%)                      |
| 4,[5],12:i:-          | 2 (2.2%)                      |
| Agona                 | 2 (2.2%)                      |
| Idikan                | 2 (2.2%)                      |
| Orion/Orion var. 15+  | 2 (2.2%)                      |
| Schwarzengrund        | 2 (2.2%)                      |
| Enteritidis           | 1 (1.1%)                      |
| Heidelberg            | 1 (1.1%)                      |
| Infantis              | 1 (1.1%)                      |
| Kiambu                | 1 (1.1%)                      |
| Litchfield            | 1 (1.1%)                      |
| Liverpool             | 1 (1.1%)                      |
| Mbandaka              | 1 (1.1%)                      |
| Minnesota             | 1 (1.1%)                      |
| Rough O:K:1,5         | 1 (1.1%)                      |
| Saintpaul             | 1 (1.1%)                      |
| Senftenberg           | 1 (1.1%)                      |
| Soerenga              | 1 (1.1%)                      |
| Thompson              | 1 (1.1%)                      |
| Worthington           | 1 (1.1%)                      |
