# Supplementary material for: Association of ISVsa3 with Multidrug Resistance in Salmonella enterica Isolates from Cattle (Bos taurus)
Source: MDPI journal article supplement (doi:10.3390/microorganisms11030631), 2023-03-01
Supplement: s1 [file s1]

**Table S5. Primer pairs and products used in endpoint PCR assays.**

| Primer          | Sequence                 | Amplicon (bp) | Reference  |
|-----------------|--------------------------|---------------|------------|
| Single-plex PCR |                          |               |            |
| APH(3'')-Ib-3F  | GTCAGAGGCGGAGAATCTGG     | 729           | This study |
| APH(3'')-Ib-3R  | TCGCAGATAGAAGGCAAGGC     |               |            |
| APH(6)-Id-3F    | ACTCCTGCAATCGTCAAGGG     | 721           | This study |
| APH(6)-Id-3R    | TCTGTGCGCACCTGCTTGATC    |               |            |
| CMY-F           | CCGGACACCTTTTTGCTTTT     | 1205          | [30]       |
| CMY-R           | TATCCTGGGCCTCATCGTCAGTTA |               |            |
| CMY-2F          | TTCTCCGGGACAACCTTGACG    | 188           | [31]       |
| CMY-2R          | GCATCTCCCAGCCTAATCCC     |               |            |
| ISVsa3-3F       | TGGAGCATGGCTTTCTACGG     | 951           | This study |
| ISVsa3-3R       | GGGTTAGGTTGACTCTGGGC     |               |            |
| tetA-3F         | TGTCGACTACGCCATCATGG     | 895           | This study |
| tetA-3R         | CAGGCAGAGCAAGTAGAGGG     |               |            |
| Duplex PCR      |                          |               |            |
| ICEFloR-F       | CGATCTGTCTTGCCGATCTT     | 84            | [27]       |
| ICEFloR-R       | GACGAAGAAGGTGCCCATAC     |               |            |
| ICESul2-F       | CGTTATGCATTCGGTGCAAG     | 135           | [27]       |
| ICE Sul2-R      | AGGCGGTTGCGTTTGATA       |               |            |
| Three-plex PCR  |                          |               |            |
| ICEFloR-F       | CGATCTGTCTTGCCGATCTT     | 84            | [27]       |
| ICEFloR-R       | GACGAAGAAGGTGCCCATAC     |               |            |
| ICESul2-F       | CGTTATGCATTCGGTGCAAG     | 135           | [27]       |
| ICE Sul2-R      | AGGCGGTTGCGTTTGATA       |               |            |
| ISVsa3-3F       | TGGAGCATGGCTTTCTACGG     | 951           | This study |
| ISVsa3-3R       | GGGTTAGGTTGACTCTGGGC     |               |            |
