# Supplementary material for: Association of ISVsa3 with Multidrug Resistance in Salmonella enterica Isolates from Cattle (Bos taurus)
Source: MDPI journal article supplement (doi:10.3390/microorganisms11030631), 2023-03-01
Supplement: s1 [file s1]

**Table S2. Frequency of association of *Salmonella* isolation with bovine source and disease manifestation in Nebraska Veterinary Diagnostic Center accessions.**

| <b>Factor</b>                                    | <b>Number of Isolates<sup>1</sup></b> | <b>Percentage of Isolates<sup>1</sup></b> |
|--------------------------------------------------|---------------------------------------|-------------------------------------------|
| Signalment available                             | 84                                    | 91.3                                      |
| Clinical history and/or pathology data available | 78                                    | 84.8                                      |
| Source of isolate                                |                                       |                                           |
| Fetus                                            | 8                                     | 8.7                                       |
| Cow/heifer                                       | 27                                    | 29.3                                      |
| Bull                                             | 3                                     | 3.3                                       |
| Feedlot/weaned                                   | 8                                     | 8.7                                       |
| Young unweaned/neonatal calf                     | 35                                    | 38.0                                      |
| Environmental                                    | 1                                     | 1.1                                       |
| No/insufficient information                      | 10                                    | 10.9                                      |
| Disease <sup>2</sup>                             | 75                                    | 81.5                                      |
| Abortion                                         | 10                                    | 10.9                                      |
| Diarrhea/enteritis/colitis                       | 49                                    | 53.3                                      |
| Pneumonia                                        | 19                                    | 20.7                                      |
| Septicemia                                       | 15                                    | 16.3                                      |

<sup>1</sup>From a total of 92 isolates.

<sup>2</sup>Disease manifestations in cattle from which *Salmonella* was isolated. Some animals had >1 disease manifestation (e.g., both pneumonia and septicemia), and both were counted. Aborted fetuses with pneumonia were counted only as abortion. In 2 accessions, the significance of *Salmonella* isolation in a case of pneumonia could not be determined since lungs were coinfectd with other primary respiratory pathogens. In 2 accessions, the significance of *Salmonella* isolation as an enteric pathogen could not be determined since the animal was coinfectd with *Mycobacterium paratuberculosis*.
