# Supplementary material for: Association of ISVsa3 with Multidrug Resistance in Salmonella enterica Isolates from Cattle (Bos taurus)
Source: Microorganisms. 2023 Mar 1;11(3):631. doi: 10.3390/microorganisms11030631 (PMC10051122; doi:10.3390/microorganisms11030631)
Supplement: Supplementary file 1 [file microorganisms-11-00631-s001.zip]

Archive with 8 entries (8 files):
- Figure S1.tif
- Table S1.pdf
- Table S2.pdf
- Table S3.xlsx
- Table S4.xlsx
- Table S5.pdf
- Table S6.xlsx
- Table S7.xlsx
