# Supplementary material for: Association of ISVsa3 with Multidrug Resistance in Salmonella enterica Isolates from Cattle (Bos taurus)
Source: Microorganisms. 2023 Mar 1;11(3):631. doi: 10.3390/microorganisms11030631 (PMC10051122; doi:10.3390/microorganisms11030631)
Supplement: Supplementary file 1 [file microorganisms-11-00631-s001.zip › Table S3.xlsx]

## Sheet: Sheet1
Table S3. List of Salmonella isolates from Nebraska Veterinary Diagnostic Center arranged in chronological order of isolation with accompanying information concerning signalment, clinical history, sample type, serotype and antimicrobial resistance phenotype.
Isolate	Date	Signalment	Clinical History/Pathology	Sample1	Serotype2	AMR Phenotype3	WGS4
RM020	2011-07-14 09:50:46	Feedlot heifer	Death; bronchopneumonia	Lung	Montevideo	Pan-susceptible	-
RM021	2011-12-30 08:48:23	Dairy bucket calf	Bloody diarrhea	Feces	Montevideo	Pan-susceptible	-
RM022	2012-01-04 10:52:54	Adult bull	No Information	Feces	Muenster	Pan-susceptible	-
RM023	2012-02-21 14:47:01	Pregnant cow	Septicemia; diarrhea, abortion, death; necrotizing enterocolitis and placentitis	Tissue pool (liver, large and small intestines from cow, and pooled fetal tissues)	Newport	SDM	-
RM024	2012-03-01 10:27:51	Aborted fetus, stillborn calf, dead neonatal (36-hr-old) calf	Cows lethargic, abortions, stillborn calves, neonatal calf death	Tissue pool from calf (liver, lung, small intestine) and aborted fetus	Newport	Pan-susceptible	-
RM025	2012-12-12 10:18:10	Aborted fetus	Abortions; fetal suppurative bronchopneumonia	Pooled fetal tissues	Oranienburg	Pan-susceptible	-
RM026	2013-09-20 08:15:37	Aborted fetus	Abortions; fetal necrosuppurative hepatitis; fibrinosuppurative encephalitis	Pooled fetal tissues	Mbandaka	Pan-susceptible	-
RM027	2014-06-23 09:19:01	Cow	Anorexia, bloody diarrhea, death	Small intestine, cow	Salmonella species	SDM	-
RM028	2014-08-12 09:05:36	Adult (18-mo.-old) steer	Death; enteritis	Pool of small and large intestines	Montevideo	CTET, OXY	-
RM029	2014-08-18 14:26:20	No information	Environmental	Flush tank	Anatum	SDM	-
RM030	2015-01-13 14:05:18	Aborted fetus	Abortions in heifers; fetal necrotizing nephritis	Pooled fetal tissues	Typhimurium	SDM	-
RM031	2015-02-16 09:08:35	Neonatal (3-day-old) calf	Septicemia; fibrinous interstitial pneumonia; bacterial colonies in splenic sinuses; acute myositis and spenitis	Liver, lung	Agona	Pan-susceptible	-
RM032	2015-03-09 09:28:07	Cow	No information	Feces	Typhimurium	SDM	-
RM033	2015-03-10 09:03:34	Neonatal (14-day-old) calf	No information	Feces	Senftenberg	SDM	-
RM034	2015-03-17 09:08:47	Neonatal (4-5-day-old) calf	Diarrhea, milky or bloody, bloating	Small intestine	Muenchen	SDM	-
RM035	2015-03-25 09:06:43	Neonatal (13-24-day-old) calves	No information	Feces	Enteritidis	SDM	-
RM036	2015-04-03	Cow	Bloody diarrhea	Feces	Typhimurium	SDM	-
RM037	2015-04-10	Feedlot cattle	No information	Feces	Newport	CTET, FFN, OXY, SDM, XNL	+
RM038	2015-04-14	Feedlot cattle	Bloody diarrhea	Feces	Newport	CTET, FFN, OXY, SDM, XNL	+
RM039	2015-04-23 10:06:24	Heifer	Fever, diarrhea	Feces	Typhimurium	SDM	-
RM040	2015-04-28 10:15:23	Beef cow	No information	Feces	Newport	CTET, SDM	-
RM041	2015-04-28	Feedlot cattle	Bloody diarrhea	Feces	Newport	CTET, FFN, OXY, SDM, XNL	+
RM042	2015-05-19 10:46:26	Adult dairy cow	Diarrhea, Also positive for Mycobacerium paratuberculosis	Feces	Montevideo	Pan-susceptible	-
RM043	2015-05-20	Calf	Septicemia; fever, bloody diarrhea, dyspnea, death; necrosuppurative hepatitis, nephritis, splenitis; suppurative interstitial pneumonia	Pool of lung and small intestine	Dublin	CTET, FFN, OXY, SDM, XNL	+
RM044	2015-06-08	Cow	Lethargy, watery diarrhea, weight loss, death	Feces	Typhimurium	SDM	-
RM045	2015-06-08	Bovine beef	Acute death; multifocal centrilobular necrosis in liver	Lung	Typhimurium	Pan-susceptible	-
RM046	2015-06-17 08:39:41	Neonatal (4-day-old) calf	Diarrhea; feces also positive for bovine rotavirus A and bovine coronavirus	Feces	Litchfield	CTET, OXY, SDM	-
RM047	2015-08-17 08:33:41	Dairy	No information	Feces	Montevideo	Pan-susceptible	-
RM048	2015-10-06 10:49:00	No information	Septicemia; acute death; fibrin thrombi in small intestinal blood vessels	Small intestine and blood clots	Muenchen	SDM	-
RM049	2015-10-15	Recently weaned calves	Bloody diarrhea; feces also positive for coccidia	Feces	Newport	CTET, FFN, OXY, SDM, XNL	+
RM050	2017-03-07 10:54:08	Beef cow	Necrosuppurative colitis; centrilobular degeneration in liver	Liver	Newport	SDM	-
RM051	2017-03-08 15:22:30	No information	Feces also positive for bovine coronavirus (Ct 23) and coccidia (moderate)	Feces	Agona	Pan-susceptible	-
RM052	2017-04-04	Dairy	Necrosuppurative bronchopneumonia; lung also positive for Histophilus somni, Mannheimia haemolytica, and Mycoplasma bovis	Lung	Dublin	CTET, FFN, OXY, SDM	+
RM053	2017-05-05	Bovine	No information	Feces	Newport	CTET, OXY, SDM	-
RM054	2017-05-09 10:46:46	No information	Septicemia; multifocal necrotizing hepatitis; abomasal ulcers; lung also positive for Pasteurella multocida and Mannheimia haemolytica	Lung	4, [5], 12:i:-	CTET, OXY, SDM	+
RM055	2017-05-11	Beef calf	No clinical history; feces also positive for Cryptosporidium sp., bovine rotavirus A, and bovine coronavirus	Feces	Muenster	DANO, ENRO, FFN, SDM	+
RM056	2017-08-29 11:35:55	Calf	Fever, bloody diarrhea	Feces	Muenster	CTET, OXY, SDM	-
RM057	2017-09-01 08:28:27	Cow	Diarrhea, weight loss; hemorrhagic enteritis and mesenteric lymphadenitis; thrombosis of kidney (septicemia); low numbers coccidia in intestine	Pool of small and large intestines	Salmonella species	CTET, OXY, SDM	-
RM058	2017-09-15 10:25:19	Dairy cow	No information	Feces	Montevideo	Pan-susceptible	-
RM059	2017-10-20 10:26:57	Dairy cow	Mild lymphocytic enteritis; mild centrilobular fatty change (liver); mild plasmacytic interstitial nephritis	Pool of tissues	Minnesota	SDM	-
RM060	2017-11-10 16:21:21	Aborted fetus	Abortion	Pooled fetal tissues	Schwarzengrund	Pan-susceptible	-
RM061	2017-12-11 08:28:45	Beef Adult	Lymphohistiocytic enteritis; fibrinosuppurative pleuropneumonia	Pool of small and large intestines, and feces	Orion	Pan-susceptible	-
RM062	2017-12-28 11:07:04	Aborted fetus	Abortion; placentitis with numerous coccobacilli	Pooled fetal tissues, including placenta	Anatum	SDM	-
RM063	2018-01-05 08:47:37	Cow (5-year-old)	Septicemia; cow aborted previously (RM062); multifocal necrotizing hepatitis; thrombosis of organs	Pool of feces, kidney, liver	Anatum	Pan-susceptible	-
RM064	2018-01-24 11:27:07	No information	Neurological signs; fibrinosuppurative bronchopneumonia; lung positive for Mannhemia haemolytica and Mycoplasma bovis; Trueperella pyogenes isolated from liver	Brain	Idikan	SDM	-
RM065	2018-01-26 11:06:35	Cow	Aborted previously	Uterine swab	Typhimurium	Pan-susceptible	-
RM066	2018-02-22	Cow (2-year-old)	Aborted previously	Uterine swab	Typhimurium	Pan-susceptible	-
RM067	2018-03-27	Cow ("older")	Diarrhea, inappetence	Feces	Muenchen	ENRO, GEN	-
RM068	2018-04-23	Beef cow (7 years)	History of enteric disease issues on farm; anorexia, lethargy, death; fibrinosuppurative bronchopneumonia, with Mannheimia haemolytica isolated from lung; feces also positive for Mycobacterium paratuberculosis	Feces	Kiambu	SDM	-
RM069	2018-04-23	Calf	Hypothermic, dehydrated, death; mild fibrinosuppurative interstitial pneumonia	Small intestine	Oranienburg	Pan-susceptible	-
RM070	2018-04-30	Calf	Septicemia; death; necrotizing hepatitis, fibrin thrombi in kidneys, splenic congestion, necrotizing enteritis	Small and large intestines, and lung	Typhimurium	Pan-susceptible	-
RM071	2018-05-03	Calf	Diarrhea, weakness, weight loss, death; suppurative enterocolitis; pyogranulomatous bronchopneumonia with lung positive for Pasteurella multocida and Mycoplasma bovis	Feces	Muenster	SDM	-
RM072	2018-05-07	Cow ("middle-aged")	Cow nursing 1-month-old calf; has anorexia, lethargy, weight loss; fibrinous colitis	Feces	Typhimurium	Pan-susceptible	-
RM073	2018-05-14	Aborted fetus and cows	Abortions, diarrhea, death of cows	Pooled fetal tissues and feces of 3 cows	Typhimurium	Pan-susceptible	-
RM074	2018-05-16	Beef calf (11-days-old)	Diarrhea; feces also positive for bovine coronavirus and Cryptosporidium sp.	Feces	Muenster	DANO, ENRO, FFN, SDM	+
RM075	2018-05-16	Cow	Septicemia; watery diarrhea, weight loss, death; fibrinohemorrhagic intestinal serositis; necrotizing hepatitis; glomerular thrombosis	Pooled liver, kidney, small and large intestines, feces	Typhimurium	Pan-susceptible	-
RM076	2018-06-04	Cow and bull	Watery diarrhea, dehydration	Feces (from each animal)	Newport	Pan-susceptible	-
RM077	2018-06-05	Cow (9-year-old)	No history; feces also positive for coccidia	Feces	Montevideo	Pan-susceptible	-
RM078	2018-06-13	Calf (8-week-old)	Enteritis, peritonitis	Feces	Typhimurium	Pan-susceptible	-
RM079	2018-07-20	Dairy calves (3 weeks old)	Fever, necrosuppurative bronchopneumonia; lung also positive for Histophilus somni and Mycoplasma bovis	Lung	Dublin	CTET, FFN, OXY, SDM, XNL	+
RM080	2018-08-01	Neonatal calf (14-day-old)	Weak, not suckling; suppurative omphalophlebitis; fibrinosuppurative, ulcerative enterocolitis; multifocal necrotizing hepatitis; fibrinosuppurative lymphadenitis	Liver	Typhimurium	Pan-susceptible	-
RM081	2018-08-31	Heifer	Photosensitization dermatitis; hepatic failure; moderate multifocal hepatocellular necrosis; suppurative nephritis; fibrinoid vasculitis in intestine	Kidney	Schwarzengrund	Pan-susceptible	-
RM083	2018-11-13	Neonatal calf (1-9-days old)	No information	Feces	Muenchen	Pan-susceptible	-
RM082	2018-11-13	Neonatal calf (1-9-days old)	No information	Feces	Infantis	Pan-susceptible	-
RM084	2019-02-12	Beef cow (5 years)	Bloody diarrhea	Feces	Orion	Pan-susceptible	-
RM085	2019-04-01	Neonatal (8-day-old) calf	Death; pyogranulomatous colitis; fibrinosuppurative lymphadenitis; suppurative hepatitis; interstitial pneumonia	Large intestine	Typhimurium	FFN, SDM	+
RM086	2019-04-05	Calf	Diarrhea, death; feces also positive for bovine coronavirus	Feces	Salmonella species	DANO, ENRO, FFN, OXY, SDM	-
RM087	2019-04-05	Calf	Diarrhea, death; feces also positive for bovine coronavirus	Feces	Thompson	Pan-susceptible	-
RM088	2019-06-12	Cow (3-year-old)	Watery diarrhea, weight loss, death	Small and large intestines	Newport	Pan-susceptible	-
RM089	2019-06-13	Calf	No information	Feces	Newport	FFN, OXY, SDM, XNL	+
RM090	2019-06-14	Cow	Weak, recumbent, bloody diarrhea; ulcerative enteritis with vasculitis and thrombosis	Small intestine	Oranienburg	Pan-susceptible	-
RM091	2019-07-08	Cow (5-year-old)	No clinical history; severe dehydration; fibrinonecrotizing colitis; necrotizing hepatitis and nephritis	Large intestine	Montevideo	Pan-susceptible	-
RM092	2019-07-26	Dairy calf (9-10-week-old)	Septicemia; fever, dyspnea; fibrinous bronchopneumonia; suppurative hepatitis and nephritis	Lung	Dublin	ENRO, FFN, OXY, SDM, XNL	+
RM093	2019-09-12	Cow	Septicemia; diarrhea, weight loss; necrosuppurative hepatitis	Small and large intestines	Anatum	DANO, ENRO, FFN, SDM, OXY, XNL	-
RM094	2019-09-17	Dairy calf (1-4 week-old)	Septicemia; icterus, dyspnea; histiocytic and suppurative interstitial pneumonia; suppurative hepatitis with vasculitis and thrombosis; suppurative interstitial nephritis; suppurative splenitis	Liver, lung, small intestine	Dublin	DANO, ENRO, FFN, OXY, XNL	+
RM095	2019-10-09	Bull (3-year-old)	No clinical history; peritonitis; hemorrhagic abomasitis and duodenitis	Liver, gallbladder, lymph node	Typhimurium	FFN, OXY, SDM, XNL	+
RM096	2019-10-09	Feedlot calf	Fever, nasal discharge, diarrhea, depression, anorexia; fibrinonecrotizing suppurative pneumonia; lung positive for Mannheimia haemolytica	Small intestine	Typhimurium	Pan-susceptible	+
RM097	2019-10-31	Neonatal (18-day-old) dairy calf	History of illness and death	Feces	Liverpool	Pan-susceptible	-
RM098	2019-11-01	Neonatal (1-9-day-old) calf	Diarrhea; feces also positive for bovine coronavirus and bovine rotavirus A	Feces	Muenster	Pan-susceptible	-
RM099	2019-11-07	Calf	Septicemia; diarrhea, dyspnea, trichobezoars; fibrinous interstitial pneumonia with abscesses	Pooled lung, small and large intestine	Dublin	ENRO, FFN, OXY, SDM, XNL	+
RM100	2020-01-15	No information	No information	Bacterial isolate	Dublin	DANO, ENRO, FFN, SDM, TET, XNL	+
RM101	2020-02-12	Dairy calf (3-7-day-old)	Diarrhea; suppurative enteritis; intestinal contents also positive for Cryptosporidium sp.	Large intestine	Heidelberg	DANO, ENRO, OXY, SDM, XNL	+
RM102	2020-02-14	Feedlot steer (850 lbs)	Septicemia; sudden death; multfocal necrotizing hepatitis with thrombosis	Liver	Idikan	Pan-susceptible	-
RM103	2020-04-01	Neonatal calf (<1 to 10-day-old)	Diarrhea	Feces	Typhimurium	Pan-susceptible	-
RM104	2020-04-03	Calf (1-week-old)	Septicemia; lethargy, abdominal bloating, anorexia, fever, dyspnea; necrotizing hepatitis; interstitial pneumonia with fibrin thrombi	Feces	Dublin	FFN, OXY, SDM, XNL	+
RM105	2020-04-07	Dairy Calf	Septicemia; fever, icterus, death; necrosuppurative bronchopneumonia; multifocal necrotizing hepatitis	Lung and small intestine	Dublin	FFN, OXY, SDM, XNL	+
RM106	2020-04-14	Neonatal calf	Diarrhea, anorexia; necrosuppurative colitis	Large intestine	Saintpaul	FFN, OXY, SDM	+
RM107	2020-04-28	Bovine	No information	Feces	Worthington	Pan-susceptible	-
RM108	2020-04-29	Cow	Diarrhea, lethargy, weight loss; periportal fibrosis with bile duct hyperplasia in liver	Pooled small intestine and liver	Newport	Pan-susceptible	+
RM109	2020-05-11	Bovine	Diarrhea	Feces	Newport	Pan-susceptible	-
RM110	2020-05-15	Calf (5-13-day-old)	Diarrhea	Feces	Muenster	SDM	-
RM111	2020-06-11	Calf (14 weeks old)	Watery diarrhea, pneumonia	Feces	Dublin	FFN, OXY, SDM, XNL	+
1Sample from which Salmonellawas isolated.
2Isolates listed as Salmonella species were non-typeable.
3AMR Phenotype: Antimicrobial Resistance Phenotype, based on results of Sensititre BOPO6F or BOPO7F testing. Antimicrobial abbreviations: AMP = Ampicillin; CTET = Chlortetracycline; DANO = Danofloxacin; ENRO = Enrofloxacin; FFN = Florfenicol; GEN = Gentamicin; NEO = Neomycin; OXY = Oxytetracycline; PEN = Penicillin; SDM = Sulfadimethoxine; SPE = Spectinomycin; TET = Tetracycline; TYLT = Tylosin t…
4WGS: Whole-genome sequencing was done.
