# Supplementary material for: Association of ISVsa3 with Multidrug Resistance in Salmonella enterica Isolates from Cattle (Bos taurus)
Source: Microorganisms. 2023 Mar 1;11(3):631. doi: 10.3390/microorganisms11030631 (PMC10051122; doi:10.3390/microorganisms11030631)
Supplement: Supplementary file 1 [file microorganisms-11-00631-s001.zip › Table S4.xlsx]

## Sheet: Sheet1
Table S4. Primers, probes and products of multiplex qPCR assays.
Target	Primer/Probe	Sequence (5'-3')	Amplicon (bp)		Label	Quencher
tetR(H)	ICETetR-F	TTTGGCTTTCTTGATGCTCTTG	105*
	ICETetR-R	GTGATGCTGGGTTTAGTCTATCT
	ICETetR-P (CY5/TAO-IAB-RQ)	CGCAATAGAGCTTAATGCATACACGGC			CY5	TAO-IAB-RQ
erm(42)	Erm-F	GCCGTTAATGCTATTGAGTTCG	88*
	Erm-R	CGGCTTCAATAATAGACACATTTGA
	Erm-P (FAM/ZEN-IAB-FQ)	AGTGTATTGGCTGATAAGTTGAGCCATG			FAM	ZEN-IAB-FQ
msrE	Msre-F	GGGTGGTTACTCGGATTACTTG	88
	Msre-R	CTCCCGTTCCTTCATCATCAG
	Msre-P (Texas Red/ IAB-RQ)	AGCGACAACACCAAGCCGTAGAAT			Texas Red	IAB-RQ
mphE	Mphe-F	TTGGAAACCCGCTACAGAAA	113
	Mphe-R	GCTCCATCCTTTGAAGCTAGT
	Mphe-P (HEX/ ZEN-IAB-FQ)	TGATGTTCTATGGGCAGATTTCACCCA			HEX**	ZEN-IAB-FQ
floR	ICEFloR-F	CGATCTGTCTTGCCGATCTT	84
	ICEFloR-R	GACGAAGAAGGTGCCCATAC
	ICEFloR-P FAM/ZEN-IAB-FQ	TGGGTTTACACTGTCGGCTTTAGCG			FAM	ZEN-IAB-FQ
blaOXA2	ICEOxa2-F	GCCGATCCTTCGACAAGTAAT	105
	ICEOxa2-R	CAGCTCGTTACGATAGAGCTTC
	ICEOxa2-P(Texas Red/ IAB-RQ)	CAATCTCGGCGCAGGAGCAAATTG			Texas Red	IAB-RQ
aphA1	ICEApha1-F	GTTTGGTTGATGCGAGTGATTT	104
	ICE Apha1-R	GACTGAATCCGGTGAGAATGG
	ICE Apha1-P(CY5/TAO-IAB-RQ)	TTCAACAGGCCAGCCATTACGCTC			CY5	TAO-IAB-RQ
sul2	ICESul2-F	CGTTATGCATTCGGTGCAAG	135
	ICE Sul2-R	AGGCGGTTGCGTTTGATA
	ICE Sul2-P (HEX/ ZEN-IAB-FQ)	ATCACATTGCGGCGTTCTTTGACG			HEX**	ZEN-IAB-FQ
	Reference: [27]
	* NCBI Blast size correction.
	**HEX was used as a alternative fluorophore for the previously published JOE and CY5.5
	8
