# Supplementary material for: Association of ISVsa3 with Multidrug Resistance in Salmonella enterica Isolates from Cattle (Bos taurus)
Source: Microorganisms. 2023 Mar 1;11(3):631. doi: 10.3390/microorganisms11030631 (PMC10051122; doi:10.3390/microorganisms11030631)
Supplement: Supplementary file 1 [file microorganisms-11-00631-s001.zip › Table S6.xlsx]

## Sheet: Sheet1
Table S6. Antibiograms, mqPCR, endpoint PCR, and whole-genome sequencing results of Salmonella enterica isolates (n = 111).1
		mqPCR 1				mqPCR 2				Endpoint PCR					WGS	NARMS Antimicrobial Resistance Phenotype (2006)3	Multidrug Resistance Based on NARMS (2006)	3Sensititre BOPO6/7F (2020) Antimicrobial Resistance Phenotype2	Multidrug Resistance Based on Sensititre BOPO6/7F	Number and type of antimicrobial classes to which isolate had acquired resistance4		Whole Genome Sequencing Results2
Isolate	Serotype	ICEtetR(H)	erm	msrE	mphE	ICEfloR	ICEblaoxa2	ICEsul2	ICEaphA1	blaCMY-2	ISVsa3	tet{A)	aph(3'')-Ib	aph(6)-Id							Location	aac(6')	aac(6')-Iaa	aadA	aadA2	ampC1	ampH	ant(3'')-Ia/aadA6	aph(3')-I family	aph(3')-Ia	aph(3'')-Ib	aph(6)-I family	aph(6)-Id	bacA	blaCMY-2	dfrA34	dhfr	erm	floR	CmlA/FloR family	fosA7	intI1	ISVsa3	ISVsa5	mphE	mrdA	msrE	blaoxa2	qacEΔ1
RM001	Derby	ND	ND	ND	ND	ND	ND	ND	ND	ND	ND	ND	0	0	1	FIS	0	ND	ND	(1) Sulfonamides	Chromosome	1	1	1	0	0	1	0	0	0	0	0	0	1	0	0	0	0	0	0	1	0	0	0	0	1	0	0	0
																					Plasmid 1	0	0	0	0	0	0	0	0	0	0	0	0	0	0	0	0	0	0	0	0	0	1	0	0	0	0	0	0
																					Plasmid 2	0	0	0	0	0	0	0	0	0	0	0	0	0	0	0	0	0	0	0	0	0	0	0	0	0	0	0	0
																					Plasmid 3	0	0	0	0	0	0	0	0	0	0	0	0	0	0	0	0	0	0	0	0	0	0	0	0	0	0	0	0
RM002	Derby	ND	ND	ND	ND	ND	ND	ND	ND	ND	ND	ND	0	0	1	FIS	0	ND	ND	(1) Sulfonamides	Chromosome	1	1	1	0	0	1	0	0	0	0	0	0	1	0	0	0	0	0	0	1	0	0	0	0	1	0	0	0
																					Plasmid 1	0	0	0	0	0	0	0	0	0	0	0	0	0	0	0	0	0	0	0	0	0	0	0	0	0	0	0	0
																					Plasmid 2	0	0	0	0	0	0	0	0	0	0	0	0	0	0	0	0	0	0	0	0	0	0	0	0	0	0	0	0
																					Plasmid 3	0	0	0	0	0	0	0	0	0	0	0	0	0	0	0	0	0	0	0	0	0	1	0	0	0	0	0	0
																					Plasmid 4	0	0	0	0	0	0	0	0	0	0	0	0	0	0	0	0	0	0	0	0	0	0	0	0	0	0	0	0
RM003	Derby	ND	ND	ND	ND	ND	ND	ND	ND	ND	ND	ND	0	0	1	FIS	0	ND	ND	(1) Sulfonamides	Chromosome	1	1	1	0	0	1	0	0	0	0	0	0	1	0	0	0	0	0	0	1	0	0	0	0	1	0	0	0
																					Plasmid 1	0	0	0	0	0	0	0	0	0	0	0	0	0	0	0	0	0	0	0	0	0	0	0	0	0	0	0	0
																					Plasmid 2	0	0	0	0	0	0	0	0	0	0	0	0	0	0	0	0	0	0	0	0	0	1	0	0	0	0	0	0
																					Plasmid 3	0	0	0	0	0	0	0	0	0	0	0	0	0	0	0	0	0	0	0	0	0	0	0	0	0	0	0	0
																					Plasmid 4	0	0	0	0	0	0	0	0	0	0	0	0	0	0	0	0	0	0	0	0	0	0	0	0	0	0	0	0
RM004	Derby	ND	ND	ND	ND	ND	ND	ND	ND	ND	ND	ND	0	0	1	FIS	0	ND	ND	(1) Sulfonamides	Chromosome	1	1	1	0	0	1	0	0	0	0	0	0	1	0	0	0	0	0	0	1	0	0	0	0	1	0	0	0
																					Plasmid 1	0	0	0	0	0	0	0	0	0	0	0	0	0	0	0	0	0	0	0	0	0	0	0	0	0	0	0	0
																					Plasmid 2	0	0	0	0	0	0	0	0	0	0	0	0	0	0	0	0	0	0	0	0	0	1	0	0	0	0	0	0
																					Plasmid 3	0	0	0	0	0	0	0	0	0	0	0	0	0	0	0	0	0	0	0	0	0	0	0	0	0	0	0	0
																					Plasmid 4	0	0	0	0	0	0	0	0	0	0	0	0	0	0	0	0	0	0	0	0	0	0	0	0	0	0	0	0
RM005	Derby	ND	ND	ND	ND	ND	ND	ND	ND	ND	ND	ND	0	0	1	FIS	0	ND	ND	(1) Sulfonamides	Chromosome	1	1	1	0	0	1	0	0	0	0	0	0	1	0	0	0	0	0	0	1	0	0	0	0	1	0	0	0
																					Plasmid 1	0	0	0	0	0	0	0	0	0	0	0	0	0	0	0	0	0	0	0	0	0	1	0	0	0	0	0	0
RM006	Derby	ND	ND	ND	ND	ND	ND	ND	ND	ND	ND	ND	0	0	1	FIS	0	ND	ND	(1) Sulfonamides	Chromosome	1	1	1	0	0	1	0	0	0	0	0	0	1	0	0	0	0	0	0	1	0	0	0	0	1	0	0	0
																					Plasmid 1	0	0	0	0	0	0	0	0	0	0	0	0	0	0	0	0	0	0	0	0	0	0	0	0	0	0	0	0
																					Plasmid 2	0	0	0	0	0	0	0	0	0	0	0	0	0	0	0	0	0	0	0	0	0	1	0	0	0	0	0	0
																					Plasmid 3	0	0	0	0	0	0	0	0	0	0	0	0	0	0	0	0	0	0	0	0	0	0	0	0	0	0	0	0
RM007	Give	0	0	0	0	0	0	0	0	0	0	0	0	0	0	CHL, FIS, KAN, NAL, STR, TET	1	Pan-susceptible	0	(0) None5	Chromosome	1	1	1	0	0	1	0	0	0	0	0	0	1	0	0	0	0	0	0	0	0	0	0	0	1	0	0	0
																					Plasmid 1	0	0	0	0	0	0	0	0	0	0	0	0	0	0	0	0	0	0	0	0	0	0	0	0	0	0	0	0
RM008	Uganda	0	0	0	0	1	0	1	0	1	1	1	1	1	1	AMP, AUG2, AXO, CHL, FIS, FOX, STR, TET, XNL	1	AMP, FFN, SDM, TET, XNL	1	(7) Aminoglycosides, amphenicols, beta-lactam/beta-lactamase inhibitor, cephalosporins (3rd-generation), penicillins, sulfonamides, tetracyclines	Chromosome	1	1	1	0	0	1	0	0	0	0	0	0	1	0	0	0	0	0	0	0	0	0	0	0	1	0	0	0
																					Plasmid 1	0	0	0	0	0	0	0	0	0	1	0	1	0	1	0	0	0	1	0	0	0	1	0	0	0	0	0	0
RM009	Uganda	0	0	0	0	1	0	1	0	1	1	1	1	1	1	AMP, AUG2, AXO, CHL, FIS, FOX, STR, TET, XNL	1	AMP, FFN, SDM, TET, XNL	1	(7) Aminoglycosides, amphenicols, beta-lactam/beta-lactamase inhibitor, cephalosporins (3rd-generation), penicillins, sulfonamides, tetracyclines	ND	ND	ND	ND	ND	ND	ND	ND	ND	ND	ND	ND	ND	ND	ND	ND	ND	ND	ND	ND	ND	ND	ND	ND	ND	ND	ND	ND	ND
																					ND	ND	ND	ND	ND	ND	ND	ND	ND	ND	ND	ND	ND	ND	ND	ND	ND	ND	ND	ND	ND	ND	ND	ND	ND	ND	ND	ND	ND
RM010	Uganda	0	0	0	0	1	0	1	0	1	1	1	1	1	1	AMP, AUG2, AXO, CHL, FIS, FOX, STR, TET, XNL	1	AMP, FFN, SDM, TET, XNL	1	(7) Aminoglycosides, amphenicols, beta-lactam/beta-lactamase inhibitor, cephalosporins (3rd-generation), penicillins, sulfonamides, tetracyclines	Chromosome	1	1	1	0	0	1	0	0	0	0	0	0	1	0	0	0	0	0	0	0	0	0	0	0	1	0	0	0
																					Plasmid 1 (IncC)	0	0	0	0	0	0	0	0	0	1	0	1	0	1	0	0	0	1	0	0	0	1	0	0	0	0	0	0
RM011	Uganda	0	0	0	0	1	0	1	0	1	1	1	1	1	1	AMP, AUG2, AXO, CHL, FIS, FOX, STR, TET, XNL	1	AMP, FFN, SDM, TET, XNL	1	(7) Aminoglycosides, amphenicols, beta-lactam/beta-lactamase inhibitor, cephalosporins (3rd-generation), penicillins, sulfonamides, tetracyclines	Chromosome	1	1	1	0	0	1	0	0	0	0	0	0	1	0	0	0	0	0	0	0	0	0	0	0	1	0	0	0
																					Plasmid 1 (IncC)	0	0	0	0	0	0	0	0	0	1	0	1	0	1	0	0	0	1	0	0	0	1	0	0	0	0	0	0
RM012	Uganda	0	0	0	0	1	0	1	0	1	1	1	0	0	0	AMP, AUG2, AXO, CHL, FIS, FOX, STR, TET, XNL	1	AMP, FFN, SDM, TET, XNL	1	(7) Aminoglycosides, amphenicols, beta-lactam/beta-lactamase inhibitor, cephalosporins (3rd-generation), penicillins, sulfonamides, tetracyclines	ND	ND	ND	ND	ND	ND	ND	ND	ND	ND	ND	ND	ND	ND	ND	ND	ND	ND	ND	ND	ND	ND	ND	ND	ND	ND	ND	ND	ND
RM013	Uganda	0	0	0	0	1	0	1	0	1	1	1	1	1	1	AMP, AUG2, AXO, CHL, FIS, FOX, STR, TET, XNL	1	AMP, FFN, SDM, TET, XNL	1	(7) Aminoglycosides, amphenicols, beta-lactam/beta-lactamase inhibitor, cephalosporins (3rd-generation), penicillins, sulfonamides, tetracyclines	Chromosome	1	1	1	0	0	1	0	0	0	0	0	0	1	0	0	0	0	0	0	0	0	0	0	0	1	0	0	0
																					Plasmid 1 (IncC)	0	0	0	0	0	0	0	0	0	1	0	1	0	1	0	0	0	1	0	0	0	1	0	0	0	0	0	0
RM014	Typhimurium	0	0	0	0	1	0	1	0	1	1	1	1	1	1	AMP, AUG2, AXO, CHL, FIS, STR, TET, XNL	1	AMP, FFN, SDM, TET, XNL	1	(7) Aminoglycosides, amphenicols, beta-lactam/beta-lactamase inhibitor, cephalosporins (3rd-generation), penicillins, sulfonamides, tetracyclines	Chromosome	1	1	1	0	0	1	0	0	0	1	0	1	1	1	0	0	0	1	0	0	0	1	0	0	1	0	0	0
																					Plasmid 1 (IncC)	0	0	0	0	0	0	0	0	0	0	0	0	0	0	0	0	0	0	0	0	0	0	0	0	0	0	0	0
RM015	Typhimurium	0	0	0	0	1	0	1	0	1	1	1	1	1	1	AMP, AUG2, AXO, CHL, FIS, FOX, STR, TET, XNL	1	AMP, FFN, SDM, TET, XNL	1	(7) Aminoglycosides, amphenicols, beta-lactam/beta-lactamase inhibitor, cephalosporins (3rd-generation), penicillins, sulfonamides, tetracyclines	Chromosome	1	1	1	0	0	1	0	0	0	1	0	1	1	1	0	0	0	1	0	0	0	1	0	0	1	0	0	0
																					Plasmid 1 (IncC)	0	0	0	0	0	0	0	0	0	0	0	0	0	0	0	0	0	0	0	0	0	0	0	0	0	0	0	0
RM016	Uganda	0	0	0	0	1	0	1	0	1	1	1	1	1	1	AMP, AUG2, AXO, CHL, FIS, FOX, STR, TET, XNL	1	AMP, FFN, SDM, TET, XNL	1	(7) Aminoglycosides, amphenicols, beta-lactam/beta-lactamase inhibitor, cephalosporins (3rd-generation), penicillins, sulfonamides, tetracyclines	Chromosome	1	1	1	0	0	1	0	0	0	0	0	0	1	0	0	0	0	0	0	0	0	0	0	0	1	0	0	0
																					Plasmid 1 (IncC)	0	0	0	0	0	0	0	0	0	1	0	1	0	1	0	0	0	1	0	0	0	1	0	0	0	0	0	0
RM017	Uganda	0	0	0	0	1	0	1	0	1	1	1	1	1	1	AMP, AUG2, AXO, CHL, CIP, FIS, GEN, STR, TET, XNL	1	AMP, FFN, SDM, TET, XNL	1	(8) Aminoglycosides, amphenicols, beta-lactam/beta-lactamase inhibitor, cephalosporins (3rd-generation), fluoroquinolones, penicillins, sulfonamides, tetracyclines	Chromosome	1	1	1	0	0	1	0	0	0	0	0	0	1	0	0	0	0	0	0	0	0	0	0	0	1	0	0	0
																					Plasmid 1 (IncC)	0	0	0	0	0	0	0	0	0	1	0	1	0	1	0	0	0	1	0	0	0	1	0	0	0	0	0	0
RM018	Uganda	0	0	0	0	1	0	1	0	1	1	1	1	1	1	AMP, AUG2, AXO, CHL, FIS, FOX, STR, TET, XNL	1	AMP, FFN, SDM, TET, XNL	1	(7) Aminoglycosides, amphenicols, beta-lactam/beta-lactamase inhibitor, cephalosporins (3rd-generation), penicillins, sulfonamides, tetracyclines	Chromosome	1	1	1	0	0	1	0	0	0	0	0	0	1	0	0	0	0	0	0	0	0	0	0	0	1	0	0	0
																					Plasmid 1 (IncC)	0	0	0	0	0	0	0	0	0	1	1	0	0	1	0	0	0	1	0	0	0	1	0	0	0	0	0	0
RM019	Give	0	0	0	0	0	0	0	0	0	0	0	0	0	1	AMP, AUG2, AXO, CHL, FIS, STR, TET, XNL	1	Pan-susceptible	0	(0) None5	Chromosome	1	1	1	0	0	1	0	0	0	0	0	0	1	0	0	0	0	0	0	0	0	0	0	0	1	0	0	0
																					Plasmid 1 (No identified origin of replication)	0	0	0	0	0	0	0	0	0	0	0	0	0	0	0	0	0	0	0	0	0	0	0	0	0	0	0	0
RM020	Montevideo	0	0	0	0	0	0	0	0	0	0	0	0	0	0	NA	NA	Pan-susceptible	0	(0) None	ND	ND	ND	ND	ND	ND	ND	ND	ND	ND	ND	ND	ND	ND	ND	ND	ND	ND	ND	ND	ND	ND	ND	ND	ND	ND	ND	ND	ND
RM021	Montevideo	0	0	0	0	0	0	0	0	0	0	0	0	0	0	NA	NA	Pan-susceptible	0	(0) None	ND	ND	ND	ND	ND	ND	ND	ND	ND	ND	ND	ND	ND	ND	ND	ND	ND	ND	ND	ND	ND	ND	ND	ND	ND	ND	ND	ND	ND
RM022	Muenster	0	0	0	0	0	0	0	0	0	0	0	0	0	0	NA	NA	Pan-susceptible	0	(0) None	ND	ND	ND	ND	ND	ND	ND	ND	ND	ND	ND	ND	ND	ND	ND	ND	ND	ND	ND	ND	ND	ND	ND	ND	ND	ND	ND	ND	ND
RM023	Newport	0	0	0	0	0	0	0	0	0	0	0	0	0	0	NA	NA	SDM	0	(1) Sulfonamides	ND	ND	ND	ND	ND	ND	ND	ND	ND	ND	ND	ND	ND	ND	ND	ND	ND	ND	ND	ND	ND	ND	ND	ND	ND	ND	ND	ND	ND
RM024	Newport	0	0	0	0	0	0	0	0	0	0	0	0	0	0	NA	NA	Pan-susceptible	0	(0) None	ND	ND	ND	ND	ND	ND	ND	ND	ND	ND	ND	ND	ND	ND	ND	ND	ND	ND	ND	ND	ND	ND	ND	ND	ND	ND	ND	ND	ND
RM025	Oranienburg	0	0	0	0	0	0	0	0	0	0	0	0	0	0	NA	NA	Pan-susceptible	0	(0) None	ND	ND	ND	ND	ND	ND	ND	ND	ND	ND	ND	ND	ND	ND	ND	ND	ND	ND	ND	ND	ND	ND	ND	ND	ND	ND	ND	ND	ND
RM026	Mbandaka	0	0	0	0	0	0	0	0	0	0	0	0	0	0	NA	NA	Pan-susceptible	0	(0) None	ND	ND	ND	ND	ND	ND	ND	ND	ND	ND	ND	ND	ND	ND	ND	ND	ND	ND	ND	ND	ND	ND	ND	ND	ND	ND	ND	ND	ND
RM027	Salmonella species	0	0	0	0	0	0	0	0	0	0	0	0	0	0	NA	NA	SDM	0	(1) Sulfonamides	ND	ND	ND	ND	ND	ND	ND	ND	ND	ND	ND	ND	ND	ND	ND	ND	ND	ND	ND	ND	ND	ND	ND	ND	ND	ND	ND	ND	ND
RM028	Montevideo	0	0	0	0	0	0	0	0	0	0	1	0	0	0	NA	NA	CTET, OXY	0	(1) Tetracyclines	ND	ND	ND	ND	ND	ND	ND	ND	ND	ND	ND	ND	ND	ND	ND	ND	ND	ND	ND	ND	ND	ND	ND	ND	ND	ND	ND	ND	ND
RM029	Anatum	0	0	0	0	0	0	0	0	0	0	0	0	0	0	NA	NA	SDM	0	(1) Sulfonamides	ND	ND	ND	ND	ND	ND	ND	ND	ND	ND	ND	ND	ND	ND	ND	ND	ND	ND	ND	ND	ND	ND	ND	ND	ND	ND	ND	ND	ND
RM030	Typhimurium	0	0	0	0	0	0	0	0	0	0	0	0	0	0	NA	NA	SDM	0	(1) Sulfonamides	ND	ND	ND	ND	ND	ND	ND	ND	ND	ND	ND	ND	ND	ND	ND	ND	ND	ND	ND	ND	ND	ND	ND	ND	ND	ND	ND	ND	ND
RM031	Agona	0	0	0	0	0	0	0	0	0	0	0	0	0	0	NA	NA	Pan-susceptible	0	(0) None	ND	ND	ND	ND	ND	ND	ND	ND	ND	ND	ND	ND	ND	ND	ND	ND	ND	ND	ND	ND	ND	ND	ND	ND	ND	ND	ND	ND	ND
RM032	Typhimurium	0	0	0	0	0	0	0	0	0	0	0	0	0	0	NA	NA	SDM	0	(1) Sulfonamides	ND	ND	ND	ND	ND	ND	ND	ND	ND	ND	ND	ND	ND	ND	ND	ND	ND	ND	ND	ND	ND	ND	ND	ND	ND	ND	ND	ND	ND
RM033	Senftenberg	0	0	0	0	0	0	0	0	0	0	0	0	0	0	NA	NA	SDM	0	(1) Sulfonamides	ND	ND	ND	ND	ND	ND	ND	ND	ND	ND	ND	ND	ND	ND	ND	ND	ND	ND	ND	ND	ND	ND	ND	ND	ND	ND	ND	ND	ND
RM034	Muenchen	0	0	0	0	0	0	0	0	0	0	0	0	0	0	NA	NA	SDM	0	(1) Sulfonamides	ND	ND	ND	ND	ND	ND	ND	ND	ND	ND	ND	ND	ND	ND	ND	ND	ND	ND	ND	ND	ND	ND	ND	ND	ND	ND	ND	ND	ND
RM035	Enteritidis	0	0	0	0	0	0	0	0	0	0	0	0	0	0	NA	NA	SDM	0	(1) Sulfonamides	ND	ND	ND	ND	ND	ND	ND	ND	ND	ND	ND	ND	ND	ND	ND	ND	ND	ND	ND	ND	ND	ND	ND	ND	ND	ND	ND	ND	ND
RM036	Typhimurium	0	0	0	0	0	0	0	0	0	0	0	0	0	0	NA	NA	SDM	0	(1) Sulfonamides	ND	ND	ND	ND	ND	ND	ND	ND	ND	ND	ND	ND	ND	ND	ND	ND	ND	ND	ND	ND	ND	ND	ND	ND	ND	ND	ND	ND	ND
RM037	Newport	0	0	0	0	1	0	1	0	1	1	1	1	1	1	NA	NA	CTET, FFN, OXY, SDM, XNL	1	(4) Amphenicols, cephalosporins (third-generation), sulfonamides, tetracyclines	Chromosome	1	1	1	0	0	1	0	0	0	0	0	0	1	0	0	0	0	0	0	0	0	0	0	0	1	0	0	0
																					Plasmid 1 (IncC)	0	0	0	0	0	0	0	0	0	1	0	1	0	1	0	0	0	1	0	0	0	1	0	0	0	0	0	0
RM038	Newport	0	0	0	0	1	0	1	0	1	1	1	1	1	1	NA	NA	CTET, FFN, OXY, SDM, XNL	1	(4) Amphenicols, cephalosporins (third-generation), sulfonamides, tetracyclines	Chromosome	1	1	1	0	0	1	0	0	0	0	0	0	1	0	0	0	0	0	0	0	0	0	0	0	1	0	0	0
																					Plasmid 1 (IncC)	0	0	0	0	0	0	0	0	0	1	0	1	0	1	0	0	0	1	0	0	0	1	0	0	0	0	0	0
RM039	Typhimurium	0	0	0	0	0	0	0	0	0	0	0	0	0	0	NA	NA	SDM	0	(1) Sulfonamides	ND	ND	ND	ND	ND	ND	ND	ND	ND	ND	ND	ND	ND	ND	ND	ND	ND	ND	ND	ND	ND	ND	ND	ND	ND	ND	ND	ND	ND
RM040	Newport	0	0	0	0	0	0	0	0	0	0	0	0	0	0	NA	NA	CTET, SDM	0	(2) Sulfonamides, tetracyclines	ND	ND	ND	ND	ND	ND	ND	ND	ND	ND	ND	ND	ND	ND	ND	ND	ND	ND	ND	ND	ND	ND	ND	ND	ND	ND	ND	ND	ND
RM041	Newport	0	0	0	0	1	0	1	0	1	1	1	1	1	1	NA	NA	CTET, FFN, OXY, SDM, XNL	1	(4) Amphenicols, cephalosporins (third-generation), sulfonamides, tetracyclines	Chromosome	1	1	1	0	0	1	0	0	0	0	0	0	1	0	0	0	0	0	0	0	0	0	0	0	1	0	0	0
																					Plasmid 1 (IncC)	0	0	0	0	0	0	0	0	0	1	0	1	0	1	0	0	0	1	0	0	0	1	0	0	0	0	0	0
RM042	Montevideo	0	0	0	0	0	0	0	0	0	0	0	0	0	0	NA	NA	Pan-susceptible	0	(0) None	ND	ND	ND	ND	ND	ND	ND	ND	ND	ND	ND	ND	ND	ND	ND	ND	ND	ND	ND	ND	ND	ND	ND	ND	ND	ND	ND	ND	ND
RM043	Dublin	0	0	0	0	1	0	1	0	1	1	1	1	1	1	NA	NA	CTET, FFN, OXY, SDM, XNL	1	(4) Amphenicols, cephalosporins (third-generation), sulfonamides, tetracyclines	Chromosome	1	1	1	0	0	1	0	0	0	0	0	0	1	1	0	0	0	0	0	0	0	0	0	0	1	0	0	0
																					Plasmid 1 (IncC)	0	0	0	0	0	0	0	0	0	1	0	0	0	1	0	0	0	1	0	0	0	1	0	0	0	0	0	0
RM044	Typhimurium	0	0	0	0	0	0	0	0	0	0	0	0	0	0	NA	NA	SDM	0	(1) Sulfonamides	ND	ND	ND	ND	ND	ND	ND	ND	ND	ND	ND	ND	ND	ND	ND	ND	ND	ND	ND	ND	ND	ND	ND	ND	ND	ND	ND	ND	ND
RM045	Typhimurium	0	0	0	0	0	0	0	0	0	0	0	0	0	0	NA	NA	Pan-susceptible	0	(0) None	ND	ND	ND	ND	ND	ND	ND	ND	ND	ND	ND	ND	ND	ND	ND	ND	ND	ND	ND	ND	ND	ND	ND	ND	ND	ND	ND	ND	ND
RM046	Litchfield	0	0	0	0	0	0	0	0	0	0	0	0	0	0	NA	NA	CTET, OXY, SDM	0	(2) Sulfonamides, tetracyclines	ND	ND	ND	ND	ND	ND	ND	ND	ND	ND	ND	ND	ND	ND	ND	ND	ND	ND	ND	ND	ND	ND	ND	ND	ND	ND	ND	ND	ND
RM047	Montevideo	0	0	0	0	0	0	0	0	0	0	0	0	0	0	NA	NA	Pan-susceptible	0	(0) None	ND	ND	ND	ND	ND	ND	ND	ND	ND	ND	ND	ND	ND	ND	ND	ND	ND	ND	ND	ND	ND	ND	ND	ND	ND	ND	ND	ND	ND
RM048	Muenchen	0	0	0	0	0	0	0	0	0	0	0	0	0	0	NA	NA	SDM	0	(1) Sulfonamides	ND	ND	ND	ND	ND	ND	ND	ND	ND	ND	ND	ND	ND	ND	ND	ND	ND	ND	ND	ND	ND	ND	ND	ND	ND	ND	ND	ND	ND
RM049	Newport	0	0	0	0	1	0	1	0	1	1	1	1	1	1	NA	NA	CTET, FFN, OXY, SDM, XNL	1	(4) Amphenicols, cephalosporins (third-generation), sulfonamides, tetracyclines	Chromosome	1	1	1	0	0	1	0	0	0	0	0	0	1	0	0	0	0	0	0	0	0	0	0	0	1	0	0	0
																					Plasmid 1 (IncC)	0	0	0	0	0	0	0	0	0	1	0	1	0	1	0	0	0	1	0	0	0	1	0	0	0	0	0	0
RM050	Newport	0	0	0	0	0	0	0	0	0	0	0	0	0	0	NA	NA	SDM	0	(1) Sulfonamides	ND	ND	ND	ND	ND	ND	ND	ND	ND	ND	ND	ND	ND	ND	ND	ND	ND	ND	ND	ND	ND	ND	ND	ND	ND	ND	ND	ND	ND
RM051	Agona	0	0	0	0	0	0	0	0	0	0	0	0	0	0	NA	NA	Pan-susceptible	0	(0) None	ND	ND	ND	ND	ND	ND	ND	ND	ND	ND	ND	ND	ND	ND	ND	ND	ND	ND	ND	ND	ND	ND	ND	ND	ND	ND	ND	ND	ND
RM052	Dublin	0	0	0	0	1	0	1	0	0	1	1	1	1	1	NA	NA	CTET, FFN, OXY, SDM	1	(3) Amphenicols, sulfonamides, tetracyclines	Chromosome	1	1	1	0	0	1	0	0	0	0	0	0	1	0	0	0	0	0	0	0	0	0	0	0	1	0	0	0
																					Plasmid 1	0	0	0	0	0	0	0	0	0	1	0	1	0	0	0	0	0	1	0	0	0	1	0	0	0	0	0	0
RM053	Newport	0	0	0	0	0	0	0	0	0	0	0	0	0	0	NA	NA	CTET, OXY, SDM	0	(2) Sulfonamides, tetracyclines	ND	ND	ND	ND	ND	ND	ND	ND	ND	ND	ND	ND	ND	ND	ND	ND	ND	ND	ND	ND	ND	ND	ND	ND	ND	ND	ND	ND	ND
RM054	Salmonella 4, [5], 12:i:-	0	0	0	0	0	0	1	0	0	0	0	1	1	1	NA	NA	CTET, OXY, SDM	0	(2) Sulfonamides, tetracyclines	Chromosome	1	1	1	0	0	1	0	0	0	1	0	1	1	0	0	0	0	0	0	0	0	0	1	0	1	0	0	0
RM055	Muenster	0	0	0	0	1	0	1	0	0	1	0	1	1	1	NA	NA	DANO, ENRO, FFN, SDM	1	(3) Amphenicols, fluoroquinolones, sulfonamides	Chromosome	1	1	1	0	0	1	0	0	0	0	0	0	1	0	0	0	0	0	0	0	0	0	0	0	1	0	0	0
																					Plasmid 1	0	0	0	0	0	0	0	0	0	0	0	0	0	0	0	0	0	0	0	0	0	0	0	0	0	0	0	0
																					Plasmid 2	0	0	0	1	0	0	0	0	0	1	1	0	0	0	0	0	0	1	0	0	1	1	0	0	0	0	0	1
																					Plasmid 3	0	0	0	0	0	0	0	0	0	0	0	0	0	0	0	0	0	0	0	0	0	0	0	0	0	0	0	0
RM056	Muenster	0	0	0	0	0	0	0	0	0	0	0	0	0	0	NA	NA	CTET, OXY, SDM	0	(2) Sulfonamides, tetracyclines	ND	ND	ND	ND	ND	ND	ND	ND	ND	ND	ND	ND	ND	ND	ND	ND	ND	ND	ND	ND	ND	ND	ND	ND	ND	ND	ND	ND	ND
RM057	Salmonella species	0	0	0	0	0	0	0	0	0	0	0	0	0	0	NA	NA	CTET, OXY, SDM	0	(2) Sulfonamides, tetracyclines	ND	ND	ND	ND	ND	ND	ND	ND	ND	ND	ND	ND	ND	ND	ND	ND	ND	ND	ND	ND	ND	ND	ND	ND	ND	ND	ND	ND	ND
RM058	Montevideo	0	0	0	0	0	0	0	0	0	0	0	0	0	0	NA	NA	Pan-susceptible	0	(0) None	ND	ND	ND	ND	ND	ND	ND	ND	ND	ND	ND	ND	ND	ND	ND	ND	ND	ND	ND	ND	ND	ND	ND	ND	ND	ND	ND	ND	ND
RM059	Minnesota	0	0	0	0	0	0	0	0	0	0	0	0	0	0	NA	NA	SDM	0	(1) Sulfonamides	ND	ND	ND	ND	ND	ND	ND	ND	ND	ND	ND	ND	ND	ND	ND	ND	ND	ND	ND	ND	ND	ND	ND	ND	ND	ND	ND	ND	ND
RM060	Schwarzengrund	0	0	0	0	0	0	0	0	0	0	0	0	0	0	NA	NA	Pan-susceptible	0	(0) None	ND	ND	ND	ND	ND	ND	ND	ND	ND	ND	ND	ND	ND	ND	ND	ND	ND	ND	ND	ND	ND	ND	ND	ND	ND	ND	ND	ND	ND
RM061	Orion var 15+	0	0	0	0	0	0	0	0	0	0	0	0	0	0	NA	NA	Pan-susceptible	0	(0) None	ND	ND	ND	ND	ND	ND	ND	ND	ND	ND	ND	ND	ND	ND	ND	ND	ND	ND	ND	ND	ND	ND	ND	ND	ND	ND	ND	ND	ND
RM062	Anatum	0	0	0	0	0	0	0	0	0	0	0	0	0	0	NA	NA	SDM	0	(1) Sulfonamides	ND	ND	ND	ND	ND	ND	ND	ND	ND	ND	ND	ND	ND	ND	ND	ND	ND	ND	ND	ND	ND	ND	ND	ND	ND	ND	ND	ND	ND
RM063	Anatum	0	0	0	0	0	0	0	0	0	0	0	0	0	0	NA	NA	Pan-susceptible	0	(0) None	ND	ND	ND	ND	ND	ND	ND	ND	ND	ND	ND	ND	ND	ND	ND	ND	ND	ND	ND	ND	ND	ND	ND	ND	ND	ND	ND	ND	ND
RM064	Idikan	0	0	0	0	0	0	0	0	0	0	0	0	0	0	NA	NA	SDM	0	(1) Sulfonamides	ND	ND	ND	ND	ND	ND	ND	ND	ND	ND	ND	ND	ND	ND	ND	ND	ND	ND	ND	ND	ND	ND	ND	ND	ND	ND	ND	ND	ND
RM065	Typhimurium	0	0	0	0	0	0	0	0	0	0	0	0	0	0	NA	NA	Pan-susceptible	0	(0) None	ND	ND	ND	ND	ND	ND	ND	ND	ND	ND	ND	ND	ND	ND	ND	ND	ND	ND	ND	ND	ND	ND	ND	ND	ND	ND	ND	ND	ND
RM066	Typhimurium	0	0	0	0	0	0	0	0	0	0	0	0	0	0	NA	NA	Pan-susceptible	0	(0) None	ND	ND	ND	ND	ND	ND	ND	ND	ND	ND	ND	ND	ND	ND	ND	ND	ND	ND	ND	ND	ND	ND	ND	ND	ND	ND	ND	ND	ND
RM067	Muenchen	0	0	0	0	0	0	0	0	0	0	0	0	0	0	NA	NA	ENRO, GEN	0	(2) Aminoglycosides, fluoroquinolones	ND	ND	ND	ND	ND	ND	ND	ND	ND	ND	ND	ND	ND	ND	ND	ND	ND	ND	ND	ND	ND	ND	ND	ND	ND	ND	ND	ND	ND
RM068	Kiambu	0	0	0	0	0	0	0	0	0	0	0	0	0	0	NA	NA	SDM	0	(1) Sulfonamides	ND	ND	ND	ND	ND	ND	ND	ND	ND	ND	ND	ND	ND	ND	ND	ND	ND	ND	ND	ND	ND	ND	ND	ND	ND	ND	ND	ND	ND
RM069	Oranienburg	0	0	0	0	0	0	0	0	0	0	0	0	0	0	NA	NA	Pan-susceptible	0	(0) None	ND	ND	ND	ND	ND	ND	ND	ND	ND	ND	ND	ND	ND	ND	ND	ND	ND	ND	ND	ND	ND	ND	ND	ND	ND	ND	ND	ND	ND
RM070	Typhimurium	0	0	0	0	0	0	0	0	0	0	0	0	0	0	NA	NA	Pan-susceptible	0	(0) None	ND	ND	ND	ND	ND	ND	ND	ND	ND	ND	ND	ND	ND	ND	ND	ND	ND	ND	ND	ND	ND	ND	ND	ND	ND	ND	ND	ND	ND
RM071	Muenster	0	0	0	0	0	0	0	0	0	0	0	0	0	0	NA	NA	SDM	0	(1) Sulfonamides	ND	ND	ND	ND	ND	ND	ND	ND	ND	ND	ND	ND	ND	ND	ND	ND	ND	ND	ND	ND	ND	ND	ND	ND	ND	ND	ND	ND	ND
RM072	Typhimurium	0	0	0	0	0	0	0	0	0	0	0	0	0	0	NA	NA	Pan-susceptible	0	(0) None	ND	ND	ND	ND	ND	ND	ND	ND	ND	ND	ND	ND	ND	ND	ND	ND	ND	ND	ND	ND	ND	ND	ND	ND	ND	ND	ND	ND	ND
RM073	Typhimurium	0	0	0	0	0	0	0	0	0	0	0	0	0	0	NA	NA	Pan-susceptible	0	(0) None	ND	ND	ND	ND	ND	ND	ND	ND	ND	ND	ND	ND	ND	ND	ND	ND	ND	ND	ND	ND	ND	ND	ND	ND	ND	ND	ND	ND	ND
RM074	Muenster	0	0	0	0	1	0	1	0	0	1	0	1	1	1	NA	NA	DANO, ENRO, FFN, SDM	1	(3) Amphenicols, fluoroquinolones, sulfonamides	Chromosome	1	1	1	0	0	1	0	0	0	0	0	0	1	0	0	0	0	0	0	0	0	0	0	0	1	0	0	0
																					Plasmid 1	0	0	0	0	0	0	0	0	0	1	1	0	0	0	0	0	0	1	0	0	1	1	0	0	0	0	0	1
																					Plasmid 2	0	0	0	0	0	0	0	0	0	0	0	0	0	0	0	0	0	0	0	0	0	0	0	0	0	0	0	0
RM075	Typhimurium	0	0	0	0	0	0	0	0	0	0	0	0	0	0	NA	NA	Pan-susceptible	0	(0) None	ND	ND	ND	ND	ND	ND	ND	ND	ND	ND	ND	ND	ND	ND	ND	ND	ND	ND	ND	ND	ND	ND	ND	ND	ND	ND	ND	ND	ND
RM076	Newport	0	0	0	0	0	0	0	0	0	0	0	0	0	0	NA	NA	Pan-susceptible	0	(0) None	ND	ND	ND	ND	ND	ND	ND	ND	ND	ND	ND	ND	ND	ND	ND	ND	ND	ND	ND	ND	ND	ND	ND	ND	ND	ND	ND	ND	ND
RM077	Montevideo	0	0	0	0	0	0	0	0	0	0	0	0	0	0	NA	NA	Pan-susceptible	0	(0) None	ND	ND	ND	ND	ND	ND	ND	ND	ND	ND	ND	ND	ND	ND	ND	ND	ND	ND	ND	ND	ND	ND	ND	ND	ND	ND	ND	ND	ND
RM078	Typhimurium	0	0	0	0	0	0	0	0	0	0	0	0	0	0	NA	NA	Pan-susceptible	0	(0) None	ND	ND	ND	ND	ND	ND	ND	ND	ND	ND	ND	ND	ND	ND	ND	ND	ND	ND	ND	ND	ND	ND	ND	ND	ND	ND	ND	ND	ND
RM079	Dublin	0	0	0	0	1	0	1	1	1	1	1	1	1	1	NA	NA	CTET, FFN, OXY, SDM, XNL	1	(4) Amphenicols, cephalosporins (third-generation), sulfonamides, tetracyclines	Chromosome	1	1	1	0	0	1	0	0	0	0	0	0	1	0	0	0	0	0	0	0	0	0	0	0	1	0	0	0
																					Plasmid 1 (IncX)	0	0	0	0	0	0	0	0	1	1	0	1	0	1	0	0	0	1	0	0	0	1	0	0	0	0	0	0
RM080	Typhimurium	0	0	0	0	0	0	0	0	0	0	0	0	0	0	NA	NA	Pan-susceptible	0	(0) None	ND	ND	ND	ND	ND	ND	ND	ND	ND	ND	ND	ND	ND	ND	ND	ND	ND	ND	ND	ND	ND	ND	ND	ND	ND	ND	ND	ND	ND
RM081	Schwarzengrund	0	0	0	0	0	0	0	0	0	0	0	0	0	0	NA	NA	Pan-susceptible	0	(0) None	ND	ND	ND	ND	ND	ND	ND	ND	ND	ND	ND	ND	ND	ND	ND	ND	ND	ND	ND	ND	ND	ND	ND	ND	ND	ND	ND	ND	ND
RM082	Muenchen	0	0	0	0	0	0	0	0	0	0	0	0	0	0	NA	NA	Pan-susceptible	0	(0) None	ND	ND	ND	ND	ND	ND	ND	ND	ND	ND	ND	ND	ND	ND	ND	ND	ND	ND	ND	ND	ND	ND	ND	ND	ND	ND	ND	ND	ND
RM083	Infantis	0	0	0	0	0	0	0	0	0	0	0	0	0	0	NA	NA	Pan-susceptible	0	(0) None	ND	ND	ND	ND	ND	ND	ND	ND	ND	ND	ND	ND	ND	ND	ND	ND	ND	ND	ND	ND	ND	ND	ND	ND	ND	ND	ND	ND	ND
RM084	Orion	0	0	0	0	0	0	0	0	0	0	0	0	0	0	NA	NA	Pan-susceptible	0	(0) None	ND	ND	ND	ND	ND	ND	ND	ND	ND	ND	ND	ND	ND	ND	ND	ND	ND	ND	ND	ND	ND	ND	ND	ND	ND	ND	ND	ND	ND
RM085	Typhimurium	0	0	0	0	1	0	0	0	0	1	0	0	0	1	NA	NA	FFN, SDM	0	(2) Amphenicols, sulfonamides	Chromosome	1	1	1	0	0	1	0	0	0	0	0	0	1	0	0	0	0	1	0	0	0	1	0	0	1	0	0	0
RM086	Salmonella species	0	0	0	0	0	0	0	0	0	0	0	0	0	0	NA	NA	DANO, ENRO, FFN, OXY, SDM	1	(4) Amphenicols, fluoroquinolones, sulfonamides, tetracyclines	ND	ND	ND	ND	ND	ND	ND	ND	ND	ND	ND	ND	ND	ND	ND	ND	ND	ND	ND	ND	ND	ND	ND	ND	ND	ND	ND	ND	ND
RM087	Thompson	0	0	0	0	0	0	0	0	0	0	0	0	0	0	NA	NA	Pan-susceptible	0	(0) None	ND	ND	ND	ND	ND	ND	ND	ND	ND	ND	ND	ND	ND	ND	ND	ND	ND	ND	ND	ND	ND	ND	ND	ND	ND	ND	ND	ND	ND
RM088	Newport	0	0	0	0	0	0	0	0	0	0	0	0	0	0	NA	NA	SDM	0	(1) Sulfonamides	ND	ND	ND	ND	ND	ND	ND	ND	ND	ND	ND	ND	ND	ND	ND	ND	ND	ND	ND	ND	ND	ND	ND	ND	ND	ND	ND	ND	ND
RM089	Newport	0	0	0	0	1	0	1	0	1	1	1	1	1	1	NA	NA	FFN, OXY, SDM, XNL	1	(4) Amphenicols, cephalosporins (third-generation), sulfonamides, tetracyclines	Chromosome	1	1	1	0	0	1	0	0	0	0	0	0	1	0	0	0	0	0	0	0	0	0	0	0	1	0	0	0
																					Plasmid 1 (IncC)	0	0	0	0	0	0	0	0	0	1	0	1	0	1	0	0	0	1	0	0	0	1	0	0	0	0	0	0
RM090	Oranienburg	0	0	0	0	0	0	0	0	0	0	0	0	0	0	NA	NA	Pan-susceptible	0	(0) None	ND	ND	ND	ND	ND	ND	ND	ND	ND	ND	ND	ND	ND	ND	ND	ND	ND	ND	ND	ND	ND	ND	ND	ND	ND	ND	ND	ND	ND
RM091	Montevideo	0	0	0	0	0	0	0	0	0	0	0	0	0	0	NA	NA	Pan-susceptible	0	(0) None	ND	ND	ND	ND	ND	ND	ND	ND	ND	ND	ND	ND	ND	ND	ND	ND	ND	ND	ND	ND	ND	ND	ND	ND	ND	ND	ND	ND	ND
RM092	Dublin	0	0	0	0	1	0	1	1	1	1	1	1	1	1	NA	NA	ENRO, FFN, OXY, SDM, XNL	1	(5) Amphenicols, fluoroquinolones, cephalosporins (third-generation), sulfonamides, tetracyclines	Chromosome	1	1	1	0	0	1	0	0	0	0	0	0	1	0	0	0	0	0	0	0	0	0	0	0	1	0	0	0
																					Plasmid 1 (IncC)	0	0	0	0	0	0	0	0	1	1	0	1	0	1	0	0	0	1	0	0	0	1	0	0	0	0	0	0
																					Plasmid 2 (IncX)	0	0	0	0	0	0	0	0	0	0	0	0	0	0	0	0	0	0	0	0	0	0	0	0	0	0	0	0
RM093	Anatum	0	0	0	0	0	0	0	0	0	0	0	0	0	0	NA	NA	DANO, ENRO, FFN, OXY, SDM, XNL	1	(5) Amphenicols, fluoroquinolones, cephalosporins (third-generation), sulfonamides, tetracyclines	ND	ND	ND	ND	ND	ND	ND	ND	ND	ND	ND	ND	ND	ND	ND	ND	ND	ND	ND	ND	ND	ND	ND	ND	ND	ND	ND	ND	ND
RM094	Dublin	0	0	0	0	1	0	1	0	1	1	1	1	1	1	NA	NA	DANO, ENRO, FFN, OXY, XNL	1	(4) Amphenicols, fluoroquinolones, cephalosporins (third-generation), tetracyclines	Chromosome	1	1	1	0	0	1	0	0	0	0	0	0	1	0	0	0	0	0	0	0	0	0	0	0	1	0	0	0
																					Plasmid 1 (IncC)	0	0	0	0	0	0	0	0	0	1	0	1	0	1	0	0	0	1	0	0	0	1	0	0	0	0	0	0
																					Plasmid 2 (IncX)	0	0	0	0	0	0	0	0	0	0	0	0	0	0	0	0	0	0	0	0	0	0	0	0	0	0	0	0
RM095	Typhimurium	0	0	0	0	1	0	1	0	1	1	1	1	1	1	NA	NA	FFN, OXY, SDM, XNL	1	(4) Amphenicols, cephalosporins (third-generation), sulfonamides, tetracyclines	Chromosome	1	1	1	0	0	1	0	0	0	0	0	0	1	0	0	0	0	0	0	0	0	0	0	0	1	0	0	0
																					Plasmid 1	0	0	0	0	0	0	0	0	0	1	0	1	0	1	0	0	0	1	0	0	0	1	0	0	0	0	0	0
RM096	Typhimurium	0	0	0	0	0	0	0	0	0	0	0	0	0	1	NA	NA	Pan-susceptible	0	(0) None	Chromosome	1	1	1	0	0	1	0	0	0	0	0	0	1	0	0	0	0	0	0	0	0	0	0	0	1	0	0	0
																					Plasmid 1 (IncFIB)	0	0	0	0	0	0	0	0	0	0	0	0	0	0	0	0	0	0	0	0	0	0	0	0	0	0	0	0
RM097	Liverpool	0	0	0	0	0	0	0	0	0	0	0	0	0	0	NA	NA	Pan-susceptible	0	(0) None	ND	ND	ND	ND	ND	ND	ND	ND	ND	ND	ND	ND	ND	ND	ND	ND	ND	ND	ND	ND	ND	ND	ND	ND	ND	ND	ND	ND	ND
RM098	Muenster	0	0	0	0	0	0	0	0	0	0	0	0	0	0	NA	NA	Pan-susceptible	0	(0) None	ND	ND	ND	ND	ND	ND	ND	ND	ND	ND	ND	ND	ND	ND	ND	ND	ND	ND	ND	ND	ND	ND	ND	ND	ND	ND	ND	ND	ND
RM099	Dublin	0	0	0	0	1	0	1	0	1	1	1	1	1	1	NA	NA	ENRO, FFN, OXY, SDM, XNL	1	(5) Amphenicols, fluoroquinolones, cephalosporins (third-generation), sulfonamides, tetracyclines	Chromosome	1	1	1	0	0	1	0	0	0	0	0	0	1	0	0	0	0	0	0	0	0	0	0	0	1	0	0	0
																					Plasmid 1 (IncC)	0	0	0	0	0	0	0	0	0	1	0	1	0	1	0	0	0	1	0	0	0	1	0	0	0	0	0	0
																					Plasmid 2 (IncX)	0	0	0	0	0	0	0	0	0	0	0	0	0	0	0	0	0	0	0	0	0	0	0	0	0	0	0	0
RM100	Dublin	0	0	0	0	1	0	1	1	1	1	1	1	1	1	NA	NA	DANO, ENRO, FFN, SDM, TET, XNL	1	(5) Amphenicols, cephalosporins (third-generation), fluoroquinolones, sulfonamides, tetracyclines	Chromosome	1	1	1	0	0	1	0	0	0	0	0	0	1	0	0	0	0	0	0	0	0	0	0	0	1	0	0	0
																					Plasmid 1 (IncC)	0	0	0	0	0	0	0	0	1	1	0	1	0	1	0	0	0	1	0	0	0	1	0	0	0	0	0	0
																					Plasmid 2 (IncX)	0	0	0	0	0	0	0	0	0	0	0	0	0	0	0	0	0	0	0	0	0	0	0	0	0	0	0	0
RM101	Heidelberg	0	0	0	0	1	0	1	1	1	1	1	1	1	1	NA	NA	DANO, ENRO, OXY, SDM, XNL	1	(4) Cephalosporins (third-generation), fluoroquinolones, sulfonamides, tetracyclines	Chromosome	1	1	1	0	0	1	0	0	0	0	0	0	1	0	0	0	0	0	0	1	0	0	1	0	1	0	0	0
																					Plasmid 1 (IncC)	0	0	0	0	0	0	1	1	1	1	0	1	0	1	0	0	0	1	1	0	1	1	1	0	0	0	0	1
																					Plasmid 2 (IncI1-I)	0	0	0	0	0	0	0	0	0	0	0	0	0	0	0	0	0	0	0	0	0	0	0	0	0	0	0	0
RM102	Idikan	0	0	0	0	0	0	0	0	0	0	0	0	0	0	NA	NA	Pan-susceptible	0	(0) None	ND	ND	ND	ND	ND	ND	ND	ND	ND	ND	ND	ND	ND	ND	ND	ND	ND	ND	ND	ND	ND	ND	ND	ND	ND	ND	ND	ND	ND
RM103	Typhimurium	0	0	0	0	0	0	0	0	0	0	0	0	0	0	NA	NA	Pan-susceptible	0	(0) None	ND	ND	ND	ND	ND	ND	ND	ND	ND	ND	ND	ND	ND	ND	ND	ND	ND	ND	ND	ND	ND	ND	ND	ND	ND	ND	ND	ND	ND
RM104	Dublin	0	0	0	0	1	0	1	1	1	1	1	1	1	1	NA	NA	FFN, OXY, SDM, XNL	1	(4) Amphenicols, cephalosporins (third-generation), sulfonamides, tetracyclines	Chromosome	1	1	1	0	0	1	0	0	0	0	0	0	1	0	0	0	0	0	0	0	0	0	0	0	1	0	0	0
																					Plasmid 1 (IncC and IncX)	0	0	0	0	0	0	0	0	1	1	0	1	0	1	0	0	0	1	0	0	0	1	0	0	0	0	0	0
RM105	Dublin	0	0	0	0	1	0	1	0	1	1	1	1	1	1	NA	NA	FFN, OXY, SDM, XNL	1	(4) Amphenicols, cephalosporins (third-generation), sulfonamides, tetracyclines	Chromosome	1	1	1	0	0	1	0	0	0	0	0	0	1	0	0	0	0	0	0	0	0	0	0	0	1	0	0	0
																					Plasmid 1 (IncC)	0	0	0	0	0	0	0	0	0	1	0	1	0	1	0	0	0	1	0	0	0	1	0	0	0	0	0	0
																					Plasmid 2 (IncX)	0	0	0	0	0	0	0	0	0	0	0	0	0	0	0	0	0	0	0	0	0	0	0	0	0	0	0	0
RM106	Saintpaul	0	0	0	0	1	0	1	0	0	1	1	1	1	1	NA	NA	FFN, OXY, SDM	1	(3) Amphenicols, sulfonamides, tetracyclines	Chromosome	1	1	1	0	0	1	0	0	0	0	0	0	1	0	0	0	0	0	0	0	0	0	0	0	1	0	0	0
																					Plasmid 1	0	0	0	0	0	0	0	0	0	1	0	1	0	0	0	0	0	1	0	0	0	1	0	0	0	0	0	0
RM107	Worthington	0	0	0	0	0	0	0	0	0	0	0	0	0	0	NA	NA	Pan-susceptible	0	(0) None	ND	ND	ND	ND	ND	ND	ND	ND	ND	ND	ND	ND	ND	ND	ND	ND	ND	ND	ND	ND	ND	ND	ND	ND	ND	ND	ND	ND	ND
RM108	Newport	0	0	0	0	0	0	0	0	0	0	0	0	0	1	NA	NA	Pan-susceptible	0	(0) None	Chromosome	1	1	1	0	0	1	0	0	0	0	0	0	1	0	0	0	0	0	0	0	0	0	0	0	1	0	0	0
RM109	Newport	0	0	0	0	0	0	0	0	0	0	0	0	0	0	NA	NA	Pan-susceptible	0	(0) None	ND	ND	ND	ND	ND	ND	ND	ND	ND	ND	ND	ND	ND	ND	ND	ND	ND	ND	ND	ND	ND	ND	ND	ND	ND	ND	ND	ND	ND
RM110	Muenster	0	0	0	0	0	0	0	0	0	0	0	0	0	0	NA	NA	SDM	0	(1) Sulfonamides	ND	ND	ND	ND	ND	ND	ND	ND	ND	ND	ND	ND	ND	ND	ND	ND	ND	ND	ND	ND	ND	ND	ND	ND	ND	ND	ND	ND	ND
RM111	Dublin	0	0	0	0	1	0	1	0	1	1	1	1	1	1	NA	NA	FFN, OXY, SDM, XNL	1	(4) Amphenicols, cephalosporins (third-generation), sulfonamides, tetracyclines	Chromosome	1	1	1	0	0	1	0	0	0	0	0	0	1	0	0	0	0	0	0	0	0	0	0	0	1	0	0	0
																					Plasmid 1 (IncC)	0	0	0	0	0	0	0	0	0	1	0	1	0	1	0	0	0	1	0	0	0	1	0	0	0	0	0	0
																					Plasmid 2 (IncX)	0	0	0	0	0	0	0	0	0	0	0	0	0	0	0	0	0	0	0	0	0	0	0	0	0	0	0	0
Total		0	0	0	0	32	0	32	5	27	32	30	31	31	41				33			41	41	41	1	0	41	1	1	5	30	3	26	41	25	0	0	0	30	1	7	3	36	3	0	41	0	0	3
Percent		0	0	0	0	30.4762	0	30.4762	4.7619	25.7143	30.4762	28.5714	27.9279	27.9279	39.0476				31.4286			100	100	100	2.43902	0	100	2.43902	2.43902	12.1951	73.1707	7.31707	63.4146	100	60.9756	0	0	0	73.1707	2.43902	17.0732	7.31707	87.8049	7.31707	0	100	0	0	7.31707
1Results listed in cells: ND = not determined; NA = not applicable; 0 = negative; 1 = positive. RM043 has 2 copies of blaCMY-2, but only one copy was counted in the total shown in cell AI177.
2Genes tested by whole-genome sequencing listed in alphabetical order.
3Refer to Tables 1 and 2 in manuscript for antimicrobial abbreviations.
4Based on results of NARMS (2006), BOPO6/7F, or both.
5Isolate became pan-susceptible in storage.
[truncated: 10 more columns]
